# Supplementary material for: Evidence Use in the Development of the Australian Dietary Guidelines: A Qualitative Study
Source: MDPI journal article supplement (doi:10.3390/nu13113748), 2021-10-23
Supplement: s1 [file s1]

**Table S1.** semi-structured interview guide.

|                                                           |                                                                                                                                                                                                                                                                                                                                                                                                                                                                                                                                                                                                                                                                                                                                                                                                                                                                                                                                                                                                                                                                         |
|-----------------------------------------------------------|-------------------------------------------------------------------------------------------------------------------------------------------------------------------------------------------------------------------------------------------------------------------------------------------------------------------------------------------------------------------------------------------------------------------------------------------------------------------------------------------------------------------------------------------------------------------------------------------------------------------------------------------------------------------------------------------------------------------------------------------------------------------------------------------------------------------------------------------------------------------------------------------------------------------------------------------------------------------------------------------------------------------------------------------------------------------------|
| Introduction                                              | <ul style="list-style-type: none"><li>• Thank the participant for their time</li><li>• Introduce myself and the project</li><li>○ PhD focuses on evidence use in dietary guideline development</li><li>○ This study is about the Australian Dietary Guidelines (ADGs) in particular<ul style="list-style-type: none"><li>• Confirm that signed consent form has been received<ul style="list-style-type: none"><li>○ Reiterate that participation is voluntary...</li><li>○ Participation is confidential...</li></ul></li><li>○ Interview data will de-identified and stored safely...<ul style="list-style-type: none"><li>○ Audio recorded only...</li></ul></li></ul></li><li>• Check for any further questions about the study</li></ul>                                                                                                                                                                                                                                                                                                                           |
|                                                           | ***PRESS RECORD***                                                                                                                                                                                                                                                                                                                                                                                                                                                                                                                                                                                                                                                                                                                                                                                                                                                                                                                                                                                                                                                      |
| Key concepts                                              | <ul style="list-style-type: none"><li>• During the interview we'll talk about...<ul style="list-style-type: none"><li>○ Evidence use in development of the current ADGs...<ul style="list-style-type: none"><li>○ What could be done differently going forward...<ul style="list-style-type: none"><li>• Just to provide some context...</li></ul></li></ul></li><li>○ We know that dietary guidelines should be evidence based, and that many different types of evidence can be used...</li></ul></li><li>• When we think about the different types of evidence that can be used, we can think about...<ul style="list-style-type: none"><li>○ Exposures: nutrients, foods, dietary patterns</li><li>○ Outcomes: nutritional adequacy, chronic disease risk</li><li>○ Study designs: RCTs, observational studies</li></ul></li><li>• There are also different ways that this evidence can be reviewed e.g. for the current ADGs:<ul style="list-style-type: none"><li>○ Systematic reviews – mostly foods/food groups</li><li>○ Narrative reviews</li></ul></li></ul> |
|                                                           | Can you tell me about your role in the evidence review that informed the current ADGs?                                                                                                                                                                                                                                                                                                                                                                                                                                                                                                                                                                                                                                                                                                                                                                                                                                                                                                                                                                                  |
| Evidence use in development of current dietary guidelines | <ul style="list-style-type: none"><li>• Developing review methods?<ul style="list-style-type: none"><li>○ Developing research questions?</li><li>○ Inclusion criteria and search strategy?</li><li>○ Quality assessment methods?<ul style="list-style-type: none"><li>• Conducting the reviews?</li><li>○ Conducing the searches?</li><li>○ Screening search results?</li></ul></li><li>○ Extracting data from included studies?</li><li>○ Conducting quality assessments?</li></ul></li><li>• Translating evidence into dietary guidelines?<ul style="list-style-type: none"><li>○ Food modelling component?</li></ul></li></ul>                                                                                                                                                                                                                                                                                                                                                                                                                                       |
| Evidence use in development of future dietary guidelines  | In developing the next iteration of the ADGs, how could the evidence review process be improved?                                                                                                                                                                                                                                                                                                                                                                                                                                                                                                                                                                                                                                                                                                                                                                                                                                                                                                                                                                        |
|                                                           | <ul style="list-style-type: none"><li>• Development of research questions?</li><li>• Inclusion criteria and search strategy?</li><li>• Quality assessment methods e.g. NHMRC, GRADE, other?<ul style="list-style-type: none"><li>• Stakeholder involvement?<ul style="list-style-type: none"><li>○ Consumers?</li><li>○ Food industry?</li></ul></li></ul></li></ul>                                                                                                                                                                                                                                                                                                                                                                                                                                                                                                                                                                                                                                                                                                    |
|                                                           | What types of evidence should be used to inform the next iteration of the ADGs?                                                                                                                                                                                                                                                                                                                                                                                                                                                                                                                                                                                                                                                                                                                                                                                                                                                                                                                                                                                         |
|                                                           | <ul style="list-style-type: none"><li>• Nutrient-based vs food-based vs dietary patterns?<ul style="list-style-type: none"><li>• RCTs vs observational studies?</li></ul></li><li>• Evidence from other types of research?<ul style="list-style-type: none"><li>○ Environmental sustainability?</li></ul></li></ul>                                                                                                                                                                                                                                                                                                                                                                                                                                                                                                                                                                                                                                                                                                                                                     |

- 
- Equity e.g. food access?

What are the advantages and disadvantages of using particular types of research to inform the next iteration of the ADGs?

In developing the next iteration of the ADGs, do you foresee any challenges associated with using particular types of evidence?

- Availability of relevant evidence?
  - Conflicts of interest?

If so, how could these challenges be addressed?

Are there any other comments you'd like to make?

---

Conclusion

- Thank the participant
  - Outline the next steps
  - Summary of results at completion of the study
  - Copy of the journal article once it's been published
    - Provide an opportunity for questions
  - You can contact me at any time
-
